# Supplementary material
Source: PubMed Central journal article supplement (PMC6348023)
Supplement: NIHMS988296-supplement-2.pdf [file NIHMS988296-supplement-2.pdf]

**Table S9: Post-operative Nonsurgical Treatments Prescribed Over 3 Years – online only**

|                                                                                                                       | Nonsurgical Treatment Prescribed |               |                               |               |                               |               |
|-----------------------------------------------------------------------------------------------------------------------|----------------------------------|---------------|-------------------------------|---------------|-------------------------------|---------------|
|                                                                                                                       | Any Reason                       |               | For Exodeviation <sup>a</sup> |               | For Esodeviation <sup>a</sup> |               |
|                                                                                                                       | BLRc<br>(N=101)                  | R&R<br>(N=96) | BLRc<br>(N=101)               | R&R<br>(N=96) | BLRc<br>(N=101)               | R&R<br>(N=96) |
|                                                                                                                       | N (%)                            | N (%)         | N (%)                         | N (%)         | N (%)                         | N (%)         |
| Patient status                                                                                                        |                                  |               |                               |               |                               |               |
| No non-surgical treatment prescribed                                                                                  | 83 (82)                          | 60 (63)       | 89 (88)                       | 83 (86)       | 94 (93)                       | 70 (73)       |
| Non-surgical treatment prescribed for exodeviation only <sup>a</sup>                                                  | 11 (11)                          | 10 (10)       | -----                         | -----         | -----                         | -----         |
| Non-surgical treatment prescribed for esodeviation only <sup>a</sup>                                                  | 6 (6)                            | 23 (24)       | -----                         | -----         | -----                         | -----         |
| Non-surgical treatment prescribed for or exodeviation and esodeviations at different visits during study <sup>a</sup> | 1 (<1)                           | 3 (3)         | -----                         | -----         | -----                         | -----         |
| Non-surgical treatment                                                                                                | 18 (18)                          | 36 (38)       | 12 (12)                       | 13 (14)       | 7 (7)                         | 26 (27)       |
| Patching only                                                                                                         | 3 (3)                            | 18 (19)       |                               | 4 (4)         | 3 (3)                         | 18 (19)       |
| Overminus only                                                                                                        | 2 (2)                            | 1 (1)         | 2 (2)                         | 1 (1)         |                               |               |
| Prism only                                                                                                            | 2 (2)                            | 1 (1)         | 1 (<1)                        |               | 2 (2)                         | 1 (1)         |
| Vision therapy/orthoptics only                                                                                        | 2 (2)                            | 2 (2)         | 2 (2)                         | 4 (4)         |                               |               |
| Patching and overminus                                                                                                | 1 (<1)                           |               | 1 (<1)                        |               |                               |               |
| Patching and prism                                                                                                    |                                  | 2 (2)         |                               |               |                               | 2 (2)         |
| Patching and vision therapy/orthoptics                                                                                |                                  | 3 (3)         |                               |               |                               |               |
| Patching and other                                                                                                    |                                  | 2 (2)         |                               |               |                               | 2 (2)         |
| Overminus and vision therapy/orthoptics                                                                               | 1 (<1)                           | 1 (1)         | 1 (<1)                        | 1 (1)         |                               |               |
| Prism and other                                                                                                       |                                  | 2 (2)         |                               |               |                               | 2 (2)         |
| Vision therapy/orthoptics and other                                                                                   | 3 (3)                            | 2 (2)         | 3 (3)                         | 2 (2)         |                               |               |
| Other                                                                                                                 | 4 (4)                            | 2 (2)         | 2 (2)                         | 1 (1)         | 2 (2)                         | 1 (1)         |

BLRc= bilateral lateral rectus muscle recession; R&R = unilateral lateral rectus recession combined with a medial rectus resection in same eye

<sup>a</sup>Refers to the deviation type present at the visit at which treatment was prescribed.
