# Supplementary material
Source: PubMed Central journal article supplement (PMC6348023)
Supplement: NIHMS988296-supplement-3.pdf [file NIHMS988296-supplement-3.pdf]

**Table S11a: 3-Year Outcome According to Whether Suboptimal Surgical Outcome Occurred Before 3 Years (BLRc group, N=101) (online only)**

|                                                                 | N   | Study Completion  |                        | 3-Year Status (among those who completed the visit) |                                          |                      |                                      |
|-----------------------------------------------------------------|-----|-------------------|------------------------|-----------------------------------------------------|------------------------------------------|----------------------|--------------------------------------|
|                                                                 |     | Lost to Follow Up | Completed 3-Year Visit | Reoperated                                          | Suboptimal Surgical Outcome Criteria Met | Neither <sup>a</sup> | Complete or Near-Complete Resolution |
| <b>Never Met Suboptimal Surgical Outcome</b>                    | 58  | 12                | 46                     |                                                     |                                          | 25                   | 21                                   |
| <b>Suboptimal Surgical Outcome Met Before 3 Years</b>           |     |                   |                        |                                                     |                                          |                      |                                      |
| <b>XT</b>                                                       | 26  | 1                 | 25                     | 6                                                   | 10                                       | 8                    | 1                                    |
| <b>XT with subsequent stereo loss<sup>b</sup></b>               | 1   |                   | 1                      | 1                                                   |                                          |                      |                                      |
| <b>Constant ET</b>                                              | 1   |                   | 1                      | 1                                                   |                                          |                      |                                      |
| <b>Stereo loss</b>                                              | 8   | 1                 | 7                      |                                                     | 1                                        | 2                    | 4                                    |
| <b>Stereo loss with subsequent XT<sup>c</sup></b>               | 1   |                   | 1                      |                                                     | 1                                        |                      |                                      |
| <b>XT and stereo loss</b>                                       | 1   |                   | 1                      |                                                     | 1                                        |                      |                                      |
| <b>Constant ET and stereo loss</b>                              | 2   |                   | 2                      |                                                     | 2                                        |                      |                                      |
| <b>Reoperated without meeting criteria</b>                      | 1   | 1                 |                        |                                                     |                                          |                      |                                      |
| <b>Suboptimal Surgical Outcome Criteria Met Only At 3 Years</b> |     |                   |                        |                                                     |                                          |                      |                                      |
| <b>XT</b>                                                       | 2   |                   | 2                      |                                                     | 2                                        |                      |                                      |
| <b>Total</b>                                                    | 101 | 15                | 86                     | 8 <sup>d</sup>                                      | 17                                       | 35                   | 26                                   |

BLRc= bilateral lateral rectus muscle recession

XT = exotropia  $\geq 10\Delta$  by SPCT at distance or near, confirmed by a retest

Constant ET = constant esotropia  $\geq 6\Delta$  by SPCT at distance or near, confirmed by a retest

Stereo loss = decrease in Preschool Randot near stereoacuity  $\geq 2$  octaves ( $\geq 0.6$  log arcsec) from enrollment, or to nil, confirmed by a retest

<sup>a</sup>Neither refers to participants who were not reoperated and at the 3-year visit did not meet criteria for suboptimal surgical outcome or complete or near-complete resolution.

<sup>b</sup>One participant met exotropia criteria at the 6-month visit and the stereo loss criteria at the 12-month visit.

<sup>c</sup>One participant met stereo loss criteria at 6 months and the exotropia criteria at 3 years.

<sup>d</sup>Note that a total of 9 BLRc group participants underwent reoperation (1 who was lost to follow up; 8 who completed the 3-year visit)
