# Supplementary material
Source: PubMed Central journal article supplement (PMC6348023)
Supplement: NIHMS988296-supplement-4.pdf [file NIHMS988296-supplement-4.pdf]

**Table S11b: 3-Year Outcome According to Whether Suboptimal Surgical Outcome Occurred Before 3 Years (R&R group, N = 96) (online only)**

|                                                                 | N  | Study Completion  |                        | 3-Year Status (among those who completed the visit) |                                          |                      |                                      |
|-----------------------------------------------------------------|----|-------------------|------------------------|-----------------------------------------------------|------------------------------------------|----------------------|--------------------------------------|
|                                                                 |    | Lost to Follow Up | Completed 3-Year Visit | Reoperated                                          | Suboptimal Surgical Outcome Criteria Met | Neither <sup>a</sup> | Complete or Near-Complete Resolution |
| <b>Never Met Suboptimal Surgical Outcome</b>                    | 63 | 15                | 48                     |                                                     |                                          | 20                   | 28                                   |
| <b>Suboptimal Surgical Outcome Met Before 3 Years</b>           |    |                   |                        |                                                     |                                          |                      |                                      |
| <b>XT</b>                                                       | 19 | 4                 | 15                     | 1                                                   | 6                                        | 7                    | 1                                    |
| <b>Constant ET</b>                                              | 2  |                   | 2                      |                                                     |                                          | 2                    |                                      |
| <b>Stereo loss</b>                                              | 1  |                   | 1                      |                                                     |                                          |                      | 1                                    |
| <b>Stereo loss with subsequent XT<sup>b</sup></b>               | 1  |                   | 1                      |                                                     | 1                                        |                      |                                      |
| <b>Stereo loss with subsequent constant ET<sup>c</sup></b>      | 2  |                   | 2                      |                                                     |                                          |                      | 2                                    |
| <b>Constant ET and stereo loss</b>                              | 5  |                   | 5                      | 2                                                   |                                          |                      | 3                                    |
| <b>Reoperated without meeting criteria</b>                      | 1  |                   | 1                      | 1                                                   |                                          |                      |                                      |
| <b>Suboptimal Surgical Outcome Criteria Met Only at 3 Years</b> |    |                   |                        |                                                     |                                          |                      |                                      |
| <b>XT</b>                                                       | 2  |                   | 2                      |                                                     | 2                                        |                      |                                      |
| <b>Total</b>                                                    | 96 | 19                | 77                     | 4                                                   | 9                                        | 29                   | 35                                   |

R&R = unilateral lateral rectus recession combined with a medial rectus resection in same eye

XT = exotropia  $\geq 10\Delta$  by SPCT at distance or near, confirmed by a retest

Constant ET = constant esotropia  $\geq 6\Delta$  by SPCT at distance or near, confirmed by a retest

Stereo loss = decrease in Preschool Randot near stereoacuity  $\geq 2$  octaves ( $\geq 0.6$  log arcsec) from enrollment, or to nil, confirmed by a retest

<sup>a</sup>Neither refers to participants who were not reoperated and at the 3-year visit did not meet criteria for either suboptimal surgical outcome or complete or near-complete resolution.

<sup>b</sup>One subject met the stereo loss criteria at 6 months and the exotropia criteria at the 12-month visit.

<sup>c</sup>Two participants met the stereo loss criteria at the 6-month visit and met the constant esotropia criteria at a subsequent visit (at 12 months for one and at 24 months for the other.)
