# Supplementary material
Source: PubMed Central journal article supplement (PMC6348023)
Supplement: NIHMS988296-supplement-5.pdf [file NIHMS988296-supplement-5.pdf]

**Table S14: 3-Year Stereoacuity (N=163) (online only)**

|                                                   | <b>BLR</b><br><b>(N=86)</b> | <b>R&amp;R</b><br><b>(N=77)</b> |
|---------------------------------------------------|-----------------------------|---------------------------------|
|                                                   | <b>N (%)</b>                | <b>N (%)</b>                    |
| <b>Randot Preschool Stereoacuity (arcsec)</b>     |                             |                                 |
| At 3 years <sup>a</sup>                           |                             |                                 |
| 40                                                | 34 (40)                     | 37 (48)                         |
| 60                                                | 23 (27)                     | 17 (22)                         |
| 100                                               | 19 (22)                     | 12 (16)                         |
| 200                                               | 3 (3)                       | 4 (5)                           |
| 400                                               | 4 (5)                       | 4 (5)                           |
| 800                                               | 1 (1)                       | 1 (1)                           |
| Nil                                               | 2 (2)                       | 2 (3)                           |
| Mean (SD) (log arcsec)                            | 1.9 (0.3)                   | 1.8 (0.4)                       |
| Range (log arcsec)                                | 1.6 to 3.2                  | 1.6 to 3.2                      |
| Change between baseline and 6 months <sup>b</sup> |                             |                                 |
| Mean (SD) (log arcsec)                            | 0.2 (0.4)                   | 0.2 (0.4)                       |
| Range (log arcsec)                                | -1.3 to 1.0                 | -1.4 to 1.0                     |
| <b>Distance Randot Stereoacuity (arcsec)</b>      |                             |                                 |
| At 3 years <sup>a</sup>                           |                             |                                 |
| 60                                                | 30 (35)                     | 35 (46)                         |
| 100                                               | 17 (20)                     | 7 (9)                           |
| 200                                               | 20 (23)                     | 14 (18)                         |
| 400                                               | 7 (8)                       | 10 (13)                         |
| Nil                                               | 12 (14)                     | 10 (13)                         |
| Mean (SD) (log arcsec)                            | 2.2 (0.4)                   | 2.2 (0.4)                       |
| Range (log arcsec)                                | 1.8 to 2.9                  | 1.8 to 2.9                      |
| Change between baseline and 6 months <sup>b</sup> |                             |                                 |
| Mean (SD) (log arcsec)                            | 0.1 (0.4)                   | 0.1 (0.4)                       |
| Range (log arcsec)                                | -0.9 to 1.1                 | -0.8 to 1.1                     |

BLRc= bilateral lateral rectus muscle recession; R&R = unilateral lateral rectus recession combined with a medial rectus resection in same eye; arcsec = seconds of arc; SD = standard deviation

<sup>a</sup>For treatment group comparisons of mean 3-year stereo using linear regression models adjusting for baseline stereo, P values = 0.82 and 0.93 for distance and near stereo, respectively.

<sup>b</sup>Change is defined as the baseline value minus the 3-year value, therefore positive change = improvement.
